# Supplementary material for: Active Biomolecules from Vegetable Extracts with Antitumoral Activity against Pancreas Cancer: A Systematic Review (2011–2021)
Source: MDPI journal article supplement (doi:10.3390/life12111765), 2022-11-02
Supplement: s1 [file s1]

# Supplemental material: Active biomolecules from vegetable extracts with antitumoral activity against pancreas cancer: a systematic review (2011-2021)

**Table S1.** Chemical structure of the compounds isolated in the articles included in the systematic review.

| Material (Reference) | Isolated Compounds                                                                  | Chemical structure                                                                         | Mechanism of action |
|----------------------|-------------------------------------------------------------------------------------|--------------------------------------------------------------------------------------------|---------------------|
| [14,15]              | DCA                                                                                 | 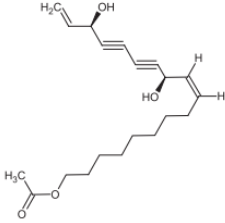        | Apoptosis           |
| [17]                 | DMC                                                                                 |        |                     |
| [19]                 | GS and GS2B rich in (A) colchicoside, (B) 3-O-demethylcolchicine and (C) colchicine | <br>A |                     |

|      |                        |                                                                                              |  |
|------|------------------------|----------------------------------------------------------------------------------------------|--|
|      |                        | 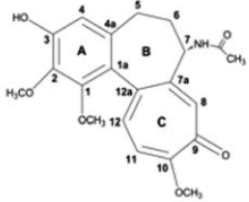 <p>B</p> |  |
|      |                        |  <p>C</p> |  |
| [22] | Cordifoliketones A     |           |  |
| [20] | BAEE rich in amygdalin |          |  |
| [23] | MGDG                   |         |  |

|      |                                                                                                                                                         |                                                                                     |                                        |
|------|---------------------------------------------------------------------------------------------------------------------------------------------------------|-------------------------------------------------------------------------------------|----------------------------------------|
| [26] | GF                                                                                                                                                      | 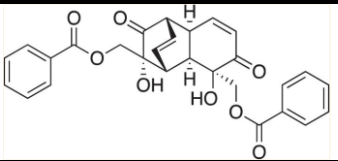 |                                        |
| [27] | (1) Eriodictyol<br>(2) Apigenin<br>(3) Butein<br>(4) Butin<br>(5) Isorhamnetin<br>(6) Sulphuretin<br>(7) Luteolin<br>(8) 3,5-O-DCAME<br>(9) 3,4-O-DCAME |   | KRAS mutation                          |
| [28] | Bergamottin                                                                                                                                             |  |                                        |
| [34] | DCAT                                                                                                                                                    |  | Arrest in some phase of the cell cycle |

|      |       |                                                                                     |                                       |
|------|-------|-------------------------------------------------------------------------------------|---------------------------------------|
| [37] | SB365 | 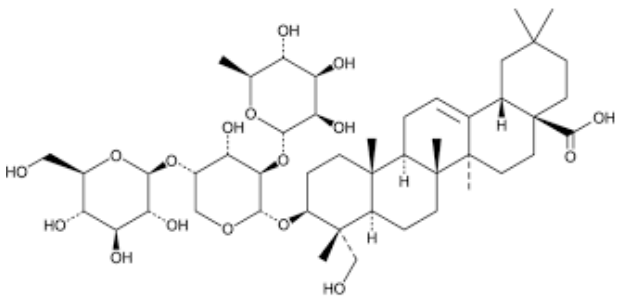  | Alteration of other important factors |
| [40] | MGDG  |  |                                       |

DCA (Devil's Club Falcarinol-Type Polyacetylenes); DCAT (9,17-octadecadiene-12,14-diyne-1,11,16-triol 1) DMC (2', 4'-Dihydroxy-6'-methoxy-3', 5'-dimethylchalcone); GF (Grandifloracin); GS (*Gloriosa superba* extract); GS2B (*Gloriosa superba* second extract); MGDG (monogalactosyl diacylglycerol); 3,4-O-DCAME (3,4-O-dicaffeoylquinic acid methyl ester); 3,5-O-DCAME (3,5-O-dicaffeoylquinic acid methyl ester); SB365 ((*Pulsatilla* saponin D)
